# Supplementary material
Source: PubMed Central journal article supplement (PMC3023370)
Supplement: supfigs.pdf [file supfigs.pdf]

1  
2  
3

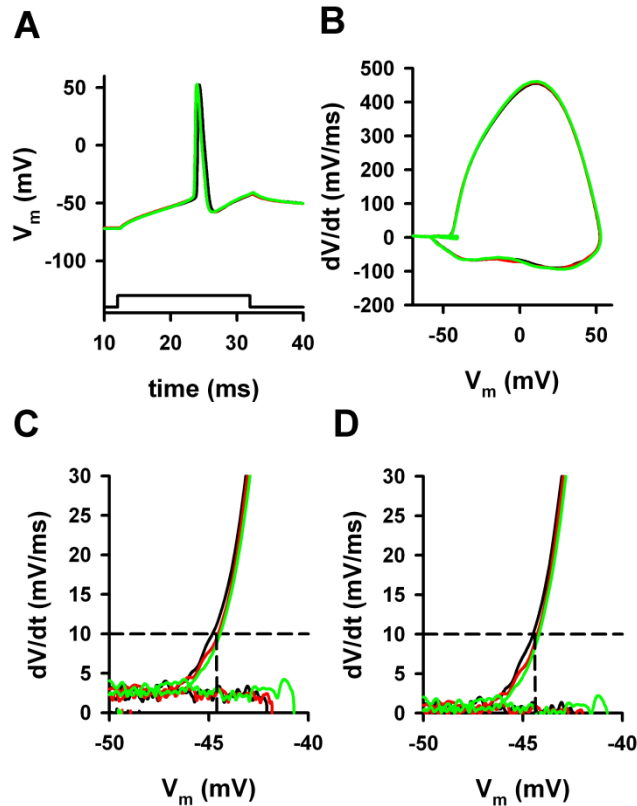

4  
5  
6  
7  
8  
9  
10  
11  
12  
13  
14

**Supplemental Figure 1.** Stability of responses and transformation of phase plots. **A.** Three successive, superimposed responses (black, red, green) of a granule neuron to fixed-amplitude depolarizing current injection are shown. The current injection is represented by the rectangular waveform below the action potential. **B.** The transformation of the raw waveform into a phase plot. **C.** The portion of the phase plots near action potential threshold. The dashed horizontal line represents the threshold used of 10 mV/ms. The vertical dashed line indicates voltage threshold on the x-axis. Note the small non-zero slope representing the passive depolarization during current injection. **D.** This passive  $dV/dt$  was subtracted from all phase plots in the paper before final calculation of voltage threshold.

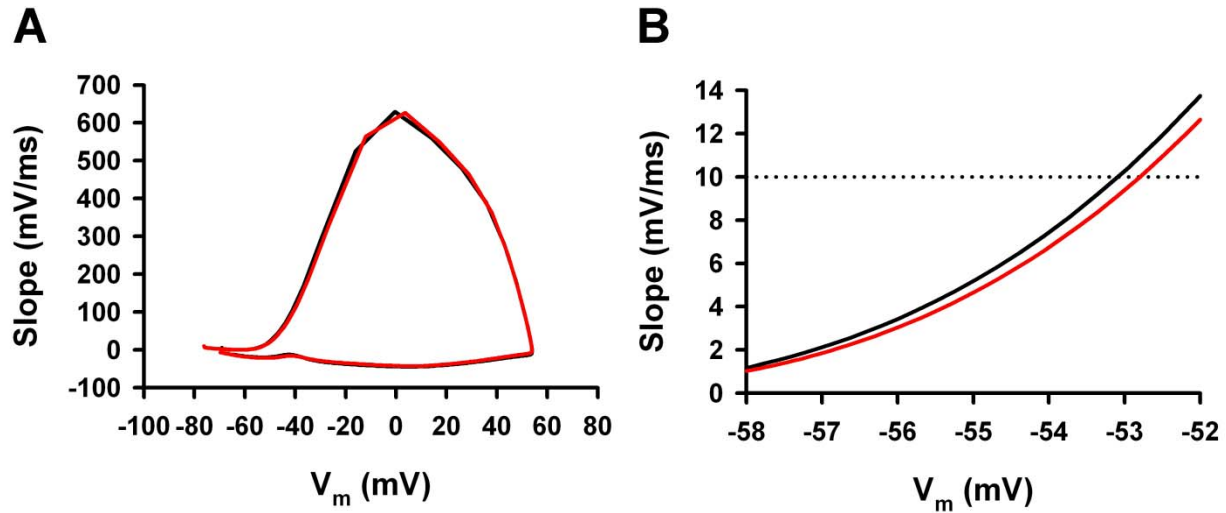

15  
16  
17  
18  
19  
20  
21  
22  
23

**Supplemental Figure 2.** Simulations with 10-fold higher sodium conductance in the AIS than in the standard simulations (50-fold higher conductance than in the rest of the axon). Black trace indicates baseline. The red trace indicates AIS GABA conductance present ( $E_{Cl} = -80$  mV). **A.** Full phase plot. Note that the phase plot peak exceeded 600 mV/ms, a higher value than ever seen experimentally, suggesting that the simulation employed a supraphysiologically high sodium conductance. **B.** Subtracted phase plots near threshold, showing that introduction of the GABA conductance still depolarized threshold measured in the soma.

24  
25

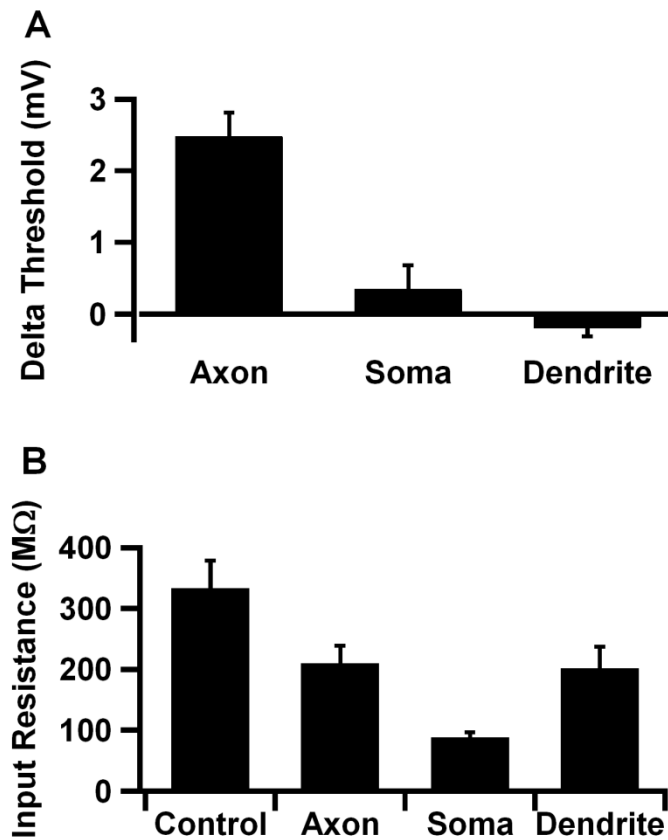

26  
27  
28  
29  
30  
31  
32

**Supplemental Figure 3.** Muscimol application to dendrites does not alter voltage threshold. Muscimol was applied to the AIS, to the soma, and to a dendrite of cells (N = 4). **A.** Dendrite application failed to alter threshold significantly although the change in input resistance was similar to that of AIS application (**B**).
